# Supplementary material for: Use of energy-dispersive X-ray fluorescence combined with chemometric modelling to classify honey according to botanical variety and geographical origin
Source: PubMed Central journal article supplement (PMC6992546; doi:10.1007/s00216-019-02255-6), 2019-11-25
Supplement: 216_2019_2255_MOESM1_ESM.pdf [file 216_2019_2255_MOESM1_ESM.pdf]

## **Analytical and Bioanalytical Chemistry**

### **Electronic Supplementary Material**

#### **Use of energy-dispersive X-ray fluorescence combined with chemometric modelling to classify honey according to botanical variety and geographical origin**

Yiannis Fiamegos, Catalina Dumitrascu, Michele Ghidotti, Maria Beatriz de la Calle Guntiñas

a)

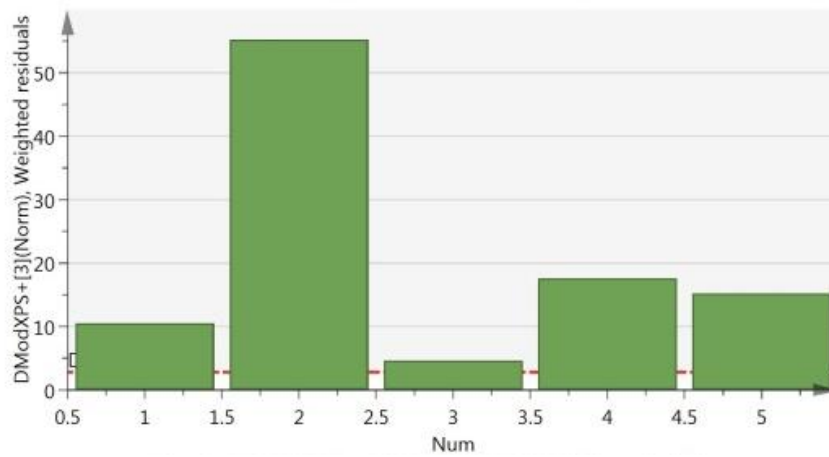

b)

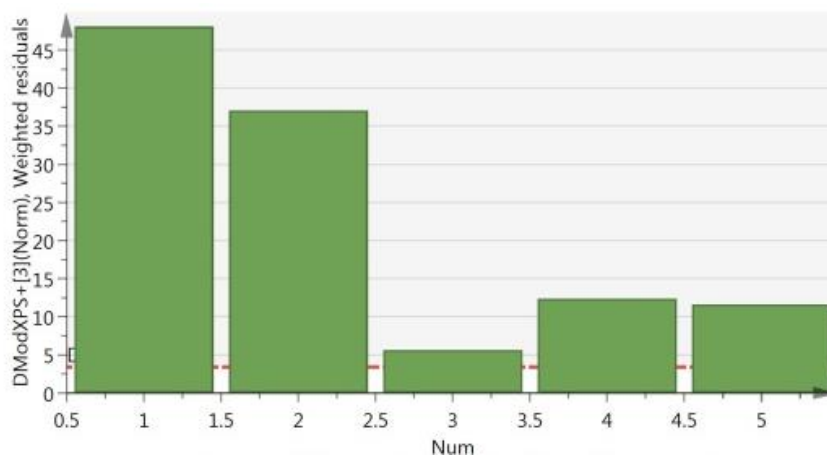

**Fig. S1** Y-axis: Mahalanobis distance,  $D_{ModX PS+}$  (Dotted red line: Critical Mahalanobis distance,  $D_{crit}$ , at 95 % CI), of five Spanish lavender honeys to the model of: a) Orange-Spain, and b) Lavender- Portugal [16], X-axis: individual sample number

a)

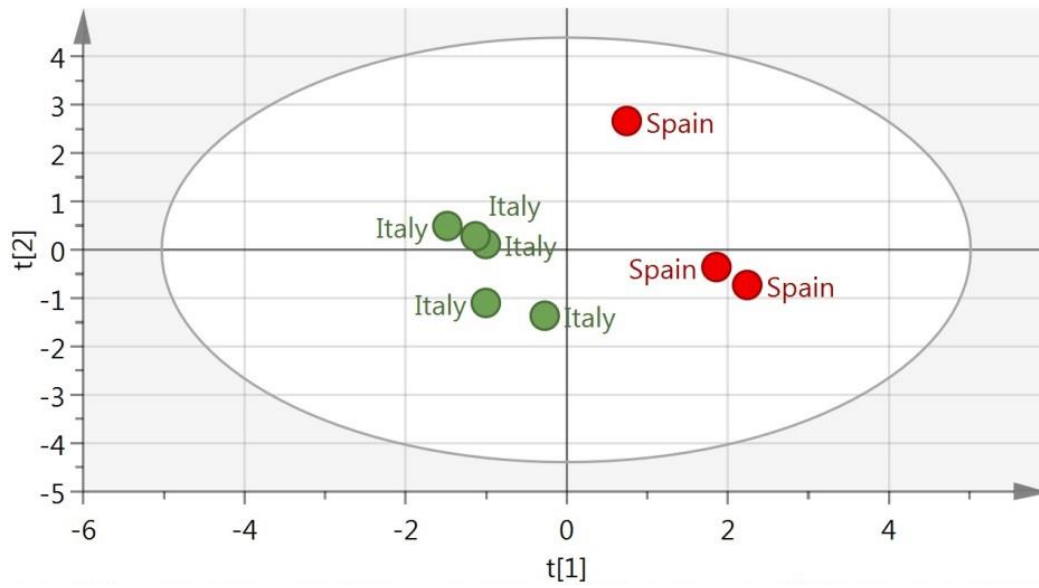

**Fig. S2** PLS model created for chestnut-Italy and chestnut-Spain.  $t[1]$  and  $t[2]$  refer to 1<sup>st</sup> and 2<sup>nd</sup> principal components respectively
